# Does batrachotoxin autoresistance co-evolve with toxicity in *Phyllobates* poison-dart frogs?

Roberto Márquez<sup>1,2\*</sup>, Valeria Ramírez-Castañeda<sup>2</sup>, Adolfo Amézquita<sup>2</sup>

<sup>1</sup>Department of Ecology and Evolution, University of Chicago. 1101 East 57th St. Chicago, IL. 60637, USA

<sup>2</sup>Department of Biological Sciences, Universidad de los Andes. A.A. 4976, Bogotá, Colombia.

\*Corresponding Author: [rmarquezp@uchicago.edu](mailto:rmarquezp@uchicago.edu), ORCID Id: 0000-0002-0644-3078

## Abstract

Toxicity is widespread among living organisms, and evolves as a multimodal phenotype. Part of this phenotype is the ability to avoid self-intoxication (autoresistance). Evolving toxin resistance can involve fitness tradeoffs, so autoresistance is often expected to evolve gradually and in tandem with toxicity, resulting in a correlation between the degrees of toxicity and autoresistance among toxic populations. We investigate this correlation in *Phyllobates* poison frogs, notorious for secreting batrachotoxin (BTX), a potent neurotoxin that targets sodium channels, using ancestral sequence reconstructions of BTX-sensing areas of the muscular voltage-gated sodium channel. Reconstructions suggest that BTX resistance arose at the root of *Phyllobates*, coinciding with the evolution of BTX secretion. After this event little or no further evolution of autoresistance seems to have occurred, despite large increases in toxicity throughout the history of these frogs. Our results therefore provide no evidence in favor of an evolutionary correlation between toxicity and autoresistance, which conflicts with previous work. Future research on the functional costs and benefits of mutations putatively involved in BTX resistance, as well as their prevalence in natural populations should shed light on the evolutionary mechanisms driving the relationship between toxicity and autoresistance in *Phyllobates* frogs.

**Key Words:** Sodium channel, Na<sub>v</sub> 1.4, Dendrobatidae chemical defense, neurotoxin resistance.

## 24 Main text

25 A wide variety of species across the tree of life accumulate toxins as defenses from predators and  
 26 parasites (Edmunds 1974; Mebs 2001). Toxicity usually evolves as a multi-level phenotype,  
 27 comprised of physiological, behavioral, and morphological traits involved in acquiring, storing,  
 28 delivering, and resisting toxins. The ability to avoid self-intoxication, also known as autoresistance,  
 29 is an important piece of this phenotypic syndrome: For toxins to represent a selective advantage  
 30 their bearer must not suffer their adverse effects. Predictably, toxic organisms display multiple auto-  
 31 resistant phenotypes, such as specialized glands or organelles to compartmentalize toxins, or  
 32 molecular changes in the toxins' targets that inhibit or decrease their effects (Daly et al. 1980; Zhou  
 33 and Fritz 1994; Geffeney et al. 2005; Zhen et al. 2012; Hanifin and Gilly 2015).

34 Although resistance can preexist toxicity, and therefore facilitate its evolution, evolving toxin  
 35 resistance often involves functional changes that can have adverse pleiotropic effects, such as  
 36 changes in nerve function (e.g. Brodie and Brodie 1999; Feldman et al. 2012) or reproductive  
 37 output (e.g. Groeters et al. 1994; Gassmann et al. 2009). Therefore, autoresistance is usually thought  
 38 to evolve gradually and in tandem with toxicity, with low levels of resistance allowing for gradual  
 39 increases in toxicity that in turn promote small increases in resistance (Dobler et al. 2011; Santos et  
 40 al. 2016). However, in cases where the cost of evolving additional autoresistance is low, the  
 41 evolution of toxicity and resistance can become uncoupled.

42 Poison frogs of the family Dendrobatidae are a promising system to study the evolution of toxicity  
 43 and autoresistance. The ability to sequester defensive alkaloids from dietary sources has evolved  
 44 independently multiple times in this group (Santos et al. 2003; Vences et al. 2003; Santos and  
 45 Cannatella 2011), and recent studies have identified amino acid substitutions on ion-transport  
 46 proteins targeted by these toxins that coincide phylogenetically with the origins of alkaloid  
 47 sequestration (Tarvin et al. 2016, 2017a; Yuan and Wang 2018). Some of these changes have been  
 48 shown to provide toxin resistance *in vitro* (Tarvin et al. 2017a; Wang and Wang 2017).

49 Within Dendrobatidae, the genus *Phyllobates* is unique for secreting Batrachotoxin (BTX; Märki  
 50 and Witkop 1963; Myers et al. 1978), one of the most powerful neurotoxins known to science ( $LD_{50}$   
 51 = 2 $\mu$ g/kg subcutaneous in mice; Tokuyama et al. 1968). Although several poison frog species from  
 52 other genera (e.g. *Andinobates*, *Dendrobates*, *Oophaga*) coexist with *Phyllobates* (Silverstone  
 53 1976; Myers et al. 1978), and feed on relatively similar prey types (Toft 1981; Caldwell 1996; Arce  
 54 and Rengifo 2013; Osorio et al. 2015), decades of chemical work on skin extracts from more than

70 species of poison frogs (Daly 1998; Daly et al. 2005; Santos et al. 2016) have only found BTX on *Phyllobates* species. This steroidal alkaloid binds to the  $\alpha$  subunit of voltage-gated sodium channels on nerve and muscle cells, reducing their affinity for  $\text{Na}^+$  ions, and leaving them permanently open and unable to experience action potentials (Märki and Witkop 1963; Daly et al. 1965; Warnick et al. 1976; Strichartz et al. 1987; Wang et al. 2006). Yet, nerve and muscle membranes of *Phyllobates aurotaenia* and *P. terribilis* are essentially insensitive to the action of BTX (Albuquerque et al. 1973; Daly et al. 1980). Even captive-bred individuals that were never exposed to BTX (which is obtained from dietary sources) showed full resistance, suggesting a strong genetic component of autoresistance (Daly et al. 1980). *Phyllobates* species vary widely in the amount of BTX stored in the skin, ranging from almost undetectable levels ( $\sim 0\text{--}1\mu\text{g}$  per frog) in *P. vittatus* and *P. lugubris* (Daly et al. 1987) to astoundingly high quantities ( $\sim 700\text{--}1900\mu\text{g}$  per frog) in *P. terribilis* (Myers et al. 1978). Furthermore, toxicity has increased at least twice in the evolutionary history of this genus, once along the branch leading to *P. aurotaenia*, *P. bicolor* and *P. terribilis*, and again in the lineage that gave rise to *P. terribilis* (Fig. 1; Myers et al. 1978; Daly et al. 1980, 1987), making this genus a fitting system to study the evolution of autoresistance.

Tarvin et. al. (2016) identified five amino acid replacements (A423S, I433V, A446D, V1583I, N1584T; numbering follows positions on the rat sequence) at or close to sites known to interact with BTX on the S6 segments of domains DI and IV of the muscular voltage-gated sodium channel ( $\text{Na}_v 1.4$ , encoded by the *SCN4A* gene) of *P. terribilis*. One of them (V1583I) was also present in *P. aurotaenia*. Further work (Wang and Wang 2017) showed that only N1584T provides BTX resistance *in vitro* when introduced onto the rat  $\text{Na}_v 1.4$ . Multiple combinations of the five substitutions were tested, and only those where N1584T was present (including N1584T alone) conferred BTX resistance.

Based on the data available from these two species, autoresistance seems to have evolved in tandem with increases in BTX levels, with *P. terribilis* having accumulated more mutations at BTX-sensing residues and greater BTX resistance than the less toxic *P. aurotaenia*. However, previous electrophysiological experiments have shown that nerve and muscle fibers of both *P. terribilis* and *P. aurotaenia* remain fully functional in the presence of BTX concentrations that completely inactivate the same tissues in other frogs, namely *Rana pipiens* (Albuquerque et al. 1973) and the dendrobatid *Oophaga histrionica* (cited as unpublished in Daly et al. 1980), indicating that both *Phyllobates* species are highly resistant to BTX. Furthermore, it was recently suggested that some of the amino acid differences observed between *P. terribilis* and *P. aurotaenia* could due to

87 sequencing artifacts (Yuan and Wang 2018), so the extent to which the SCN4A genotypes of these  
88 two species differ is unclear.

89 Our aim here is to further elucidate the history of autoresistance-related mutations in *Phyllobates*  
90 SCN4A genes, in order to evaluate the extent to which BTX autoresistance has coevolved with  
91 toxicity levels in this group. To do so, we have generated SCN4A sequences from all known species  
92 of *Phyllobates*, representing the broad spectrum of BTX variation in this group (Fig. 1), which  
93 allows us to test this correlation beyond *P. terribilis* and *aurotaenia*. If autoresistance is indeed  
94 correlated with BTX levels, species with higher BTX contents should exhibit more resistant  
95 genotypes (e.g. with a higher number of AA changes at BTX sensing sites).

## 96 **Methods**

97 Combining data from previous work (Tarvin et al. 2016; Yuan and Wang 2018) and newly generated  
98 sequences, we amassed a dataset of SCN4A sequences from 147 individuals of 45 species (35  
99 Dendrobatoids and 10 outgroups; Tables 1 and S1), including the five known species of *Phyllobates*  
100 (36 samples; 2-14 per species). Alkaloid profiles are available for 30 of the 35 dendrobatoids used  
101 (Table 1), which allows us to confidently assume that, at least among the species sequenced BTX  
102 secretion originated at the base of *Phyllobates*. Our dataset encompasses the S6 and P-loop  
103 segments of Domains I-IV of the SCN4A gene. These regions are located on the pore of the Na<sub>v</sub>1.4  
104 channel, where BTX binds, and *in vitro* directed mutagenesis studies have uncovered over a dozen  
105 mutations that confer BTX resistance to mammalian and insect voltage-gated sodium channels at  
106 these sites (Table S2). Furthermore dendrobatid frogs, including *Phyllobates* have mutations related  
107 to autoresistance at some of these regions (Tarvin et al. 2016). We then used ancestral sequence  
108 reconstructions to investigate the evolutionary history of these segments in relation to the  
109 acquisition and further increases in BTX-based toxicity among *Phyllobates* species.

## 110 *Publicly available data*

111 We downloaded publicly available SCN4A sequences for 27 dendrobatid species and seven  
112 outgroup anuran species (Table S1). Sequences from seven specimens were excluded following  
113 previously outlined concerns (Yuan and Wang 2018; Table S3). In addition, we extracted SCN4A  
114 sequences from recently published transcriptomes of *Rana pipiens* (<http://www.davislab.net/rana/>;  
115 Christenson et al. 2014) and *Rhinella marina* (<http://gigadb.org/dataset/100374>; Richardson et al.

2017), and the genome of *Nanorana pariekri* (V2, <http://gigadb.org/dataset/100132>; Sun et al. 2015). To do so, we queried the *Xenopus tropicalis* Nav<sub>v</sub> 1.4 protein sequence (ENSXTP00000031166) against each transcriptome/genome annotation with tblastn, and retained the best hit. We then confirmed orthology of these sequences to SCN4A using the phylogenetic approach detailed in the *Sequence analysis* section below.

## DNA sequencing

We sequenced the S6 segments of the DI and DIV domains from 59 individuals of 20 species of dendrobatids, 12 of which were not previously represented in public databases. DNA was extracted from toe-clip, mouth swab or liver samples using Qiagen DNeasy spin columns, and SCN4A fragments were amplified with primers designed based on the *X. tropicalis* sequence (ENSXETG00000014235), and refined as new sequences were generated. Table S4 contains primer sequences and thermal cycling protocols. PCR products were purified with ExoSap and Sanger-sequenced in both directions to confirm base calls.

## Transcriptome sequencing

We obtained a full SCN4A mRNA sequence for *P. bicolor* from a transcriptome assembly generated for an ongoing project (Márquez, R. et al. unpublished). RNA was extracted from skin, liver, heart, and muscle tissue, pooled in equimolar ratios, used to build a paired-end cDNA library, and sequenced on an Illumina HiSeq 2000. After quality trimming and adapter contamination removal with Trimmomatic (Bolger et al. 2014), we used Trinity (Grabherr et al. 2011) to generate an assembly. We then obtained the SCN4A sequence as described above for other species.

## Sequence analysis

For each of the four SCN4A fragments, we aligned all homologous sequences of each species to extract unique haplotypes, which were then aligned across species. From these alignments we built maximum likelihood trees for each segment to search for possibly contaminated sequences (Fig. S1). Next, one protein sequence was randomly selected per species for further analyses, except for *P. terribilis*, where two alleles had amino acid differences in the DI-S6 segment, so we kept both alleles. Finally, to confirm orthology of the protein sequences in our dataset (including those derived from genomes and transcriptomes) to SCN4A, we aligned them to sequences of all genes in the SCNA family from other vertebrates available in ENSEMBL and built a maximum likelihood

145 tree (Fig. S3). All alignments were done using MUSCLE (Edgar 2004), and all trees were built  
146 using PhyML (Guindon and Gascuel 2003; Guindon et al. 2010) under sequence evolution models  
147 chosen with ProtTest (Darriba et al. 2011) or jModelTest (Darriba et al. 2012).

148 In order to infer the phylogenetic origin of amino acid substitutions, we conducted ancestral  
149 sequence reconstructions in PAML (Yang 2007). Each SCN4A fragment was analyzed  
150 independently under the best protein evolution model selected by ProtTest. We provided PAML  
151 with a topology based on Grant et al. (2017) for dendrobatoid relationships and Pyron and Wiens  
152 (2011) for outgroup relationships (Figs 2-3), and optimized its branch lengths during each ancestral  
153 reconstruction. Some populations of *Phyllobates aurotaenia* and *Epipedobates boluengeri* present  
154 in our dataset have been suggested to be distinct non-sister lineages by recent studies (Grant et al.  
155 2017; Tarvin et al. 2017b), so we represented them as such in our phylogenies.

## 156 Results

157 In concordance with previous work (Tarvin et al. 2016), we found five substitutions on the S6  
158 segments of domains DI (S429A, I433V, A445D) and DIV (V1583I, N1584T) in *Phyllobates* frogs  
159 (Fig. 1). According to our ancestral sequence reconstructions, three of them (S429A, I433V,  
160 V1583I) arose at the root of the genus *Phyllobates*, coinciding with the acquisition of BTX  
161 secretion. A445D evolved earlier, at the common ancestor of *Phyllobates*, *Dendrobates*,  
162 *Ranitomeya*, *Andinobates*, and *Oophaga* (i.e. the subfamily Dendrobatinae *sensu* Grant et al. 2006,  
163 2017). Surprisingly, N1584T, the only substitution shown to confer BTX resistance on rat Na<sub>v</sub>1.4  
164 channels (Wang & Wang, 2017), was present only in a single individual of the 14 *P. terribilis*  
165 sequenced, and not found in any other species.

166 We did not find any substitutions coinciding with the origin of BTX secretion in other regions of  
167 SCN4A known to interact with BTX (i.e. DII and DIII S6 segments and DI-IV P-loops; Wang et al.  
168 2000; Wang et al. 2001; Wang et al. 2006; Fig. 2, Fig. S2). However, our ancestral reconstructions  
169 uncovered five previously unreported substitutions in these regions (Y383F, F390Y, V748I, V774T,  
170 M777L; Fig. 3) that originated in alkaloid-sequestering clades, including the ancestor of  
171 Dendrobatinae (Y383F, F390Y, V774T, M777L). Our reconstructions show that four of these  
172 substitutions (Y383F, V748I, V774T, M777L) evolved more than once (although note that, despite  
173 high posterior probabilities [all > 0.95], taxon sampling for DII and DIII is sparse), and Y383F and  
174 M777L are present in *Mantella aurantiaca*, a member of a separate, distantly related radiation of



poison frogs that convergently evolved the ability to sequester many of the same alkaloids present in dendrobatids (Garraffo et al. 1993; Daly et al. 1996). Furthermore substitution M777L was found to have occurred in parallel in five of the six frog SCNA paralogs in the recent history of dendrobatids (represented by *Oophaga pumilio*; Rogers et al. 2018). These results suggest a potential role of these five substitutions in alkaloid autoresistance that deserves further investigation.

## Discussion

Ancestral sequence reconstructions show that most of the amino acid substitutions in BTX-sensing regions of *Phyllobates* SCN4A alleles either predated or coincided with the evolution of BTX secretion, with the exception of N1584T, which seems to have evolved recently within *P. terribilis*, where it is still polymorphic and at low frequency. This points to a scenario where the ancestral *Phyllobates* Nav1.4 protein acquired autoresistance in concert with the evolution of basal levels of BTX, possibly facilitated by preexisting substitutions, and did not evolve further autoresistance as toxicity increased. In other words, our results suggest that the ancestral lineage of *Phyllobates* evolved sufficient BTX resistance at the Nav1.4 channel to withstand the broad range of toxicities currently present in its descendants. Once this high basal level of BTX resistance was acquired, the evolution of increased toxicity was released from the costs of increasing autoresistance.

This conflicts with the functional work of Wang and Wang (2017), who showed that neither of the three mutations coinciding with BTX secretion (S429A, I433V, V1583I; Fig. 2) nor their combinations decrease the susceptibility of the rat Nav1.4 to BTX. However, to fully understand the functional effects of these mutations on poison frog channels it is necessary to consider the genetic background on which they arose, since differences between the rat and *Phyllobates* channels at other sites, such as those identified in the DI P-loop and DIIS6 (Fig. 3), are likely to influence the interactions of sites 429, 433, and 1581 with BTX. For example, Tarvin et al. (2017) recently found an important effect of the genetic background (poison frog vs. human) when performing site-directed mutagenesis tests of epibatidine resistance. Although substitutions S429A, I433V and V1583I could presumably be involved in resistance to other alkaloids, they all occur at sites of demonstrated relevance in BTX binding to Nav1.4 (Wang and Wang 1998; Vendantham and Cannon 2000) or Nav1.5 (Wang et al. 2007) channels, and mutations at these sites (different from those in *Phyllobates*) confer BTX resistance to mammalian channels *in vitro* (Wang and Wang 1998; Vendantham and Cannon 2000; Wang et al. 2007; Table S2), suggesting an important role in

the evolution of BTX autoresistance. Furthermore, although none of the mutations that predated the acquisition of BTX are on sites known to interact with BTX, many are close to these sites, which leads us to suspect that at least some of them may have influenced the evolution of BTX autoresistance, and could therefore explain the discordance with the results of Wang and Wang (2017). Biochemical assays that examine the effect of mutating *Phyllobates* sequences back to ancestral genotypes should provide insight on the functional and evolutionary implications of specific mutations in BTX autoresistance. In the meantime, the molecular and physiological mechanisms behind BTX resistance in *Phyllobates* remain an open question.

It is possible that N1584T played a role in the evolution of resistance to the very high levels BTX found in *P. terribilis*, since this and other mutations at this residue confer BTX resistance to rat Nav1.4 channels *in vitro* (Wang and Wang 1999, 2017). However, the fact that this mutation occurs at low frequency in *P. terribilis* lends little support to this hypothesis. Even the lowest amount of cutaneous BTX observed in individuals of this species (~700µg) is much higher than those found in any other species (Myers et al. 1978; Daly et al. 1980, 1987). Had N1584T played an important role in allowing this increase in toxicity we would expect it to have rapidly become fixed by positive selection. Further investigation of allele frequencies at this site and BTX content variation in natural populations of *P. terribilis* could help clarify the role of N1584T in the evolution of BTX autoresistance.

Evolving neurotoxin-resistant ion channels many times involves mutations at functionally important residues, which are therefore likely to have negative pleiotropic effects. For example, several mutations that make sodium channels resistant to Tetrodotoxin (TTX), a Nav blocker, have been shown to negatively impact the channel's voltage-gating and permeability/selectivity properties (Chiamvimonvat et al. 1996; Pérez-García et al. 1996; Lee et al. 2011). In addition, substitutions that provide resistance to higher concentrations of TTX also tend to produce greater reductions in channel performance (Feldman et al. 2012). Therefore, populations of the TTX-resistant snake *Thamnophis sirtalis* appear to fine-tune their degree of TTX resistance based on the toxicity of their local newt prey (Brodie et al. 2002).

All known BTX-resistant mutations (Table S2) are located on or close to sites crucial to channel function, such as the gating hinge (formed by residues G428, G783, G1275, S1578; Zhao et al. 2004), or the ion selectivity filter (i.e. the DEKA locus; residues D400, E755, K1237, A1529; Backx et al. 1992; Favre et al. 1996), which could promote a similar correlation in BTX-resistant *Phyllobates* sodium channels. Our results, nonetheless, provide no evidence in favor of this



238 scenario. This could be due to several reasons. For example, it is possible that increased resistance  
 239 has evolved in more toxic lineages via alternative mechanisms, such as toxin modification or  
 240 sectorization. The fact that isolated nerves and muscles of *P. terribilis* and *P. aurotaenia* resist high  
 241 levels of BTX (Albuquerque et al. 1973; Daly et al. 1980), however, makes this an unlikely  
 242 scenario. Another (non-exclusive) possibility is that the combination of mutations S429A, I433V,  
 243 and V1583I may provide high BTX resistance at a low functional cost, and that this genotype arose  
 244 through an accessible mutational pathway, reducing the extent of selection against highly  
 245 autoresistant genotypes in low-toxicity individuals. Additional studies that address the functional  
 246 effects of these mutations in terms of BTX resistance and sodium channel/muscle performance  
 247 should disentangle this issue.

248 Finally, our data also contribute to the understanding of the general patterns of autoresistance  
 249 evolution in poison frogs, which accumulate many different toxic alkaloids. We inferred several  
 250 mutations evolving at the roots of alkaloid-defended clades (e.g. Y383F, 445D, V774T, V777L),  
 251 while others appear later within these clades, in closely related species with similar alkaloid profiles  
 252 (e.g. S429A, V433I). This pattern is compatible with a scenario involving initial adaptation to a  
 253 basal toxin profile followed by (and possibly allowing for) further diversification and increased  
 254 complexity of chemical defense (e.g. more diverse alkaloid profiles) among toxic clades (Santos et  
 255 al. 2016; Tarvin et al. 2016). Many of these changes occurred in parallel between alkaloid-bearing  
 256 lineages, even dendrobatids and mantellids, which diverged ~150 MYA (Kumar et al. 2017). Such  
 257 parallelisms may be due to strong functional constraints on sodium channel evolution, although  
 258 other explanations such as historical contingency can not be discarded (Wright 1932; Dean and  
 259 Thornton 2007; Stern and Orgogozo 2009).

260 Overall, our results suggest that *Phylllobates* poison frogs evolved BTX-resistant Na<sub>v</sub>1.4 sodium  
 261 channels in concert with the ability to secrete this toxin, and that the basal level of BTX resistance  
 262 was high enough to support toxicity increases throughout the evolution of the genus without  
 263 evolving further autoresistance. Future studies integrating biochemistry, physiology and population  
 264 genetics are needed to illuminate the functional and evolutionary mechanisms driving the evolution  
 265 of BTX resistance in these frogs' sodium channels, especially the functional effects of SCN4A  
 266 mutations in relation to the tradeoff (or absence thereof) between BTX resistance and sodium  
 267 channel performance.

## 268 Acknowledgements

269 We thank Chris R. Feldman, Jorge A. Molina, Andrew J. Crawford, and Mohammad A. Siddiq for  
 270 insightful comments and suggestions, Valentina Gómez-Bahamón and Daniel R. Matute for  
 271 comments on the manuscript, Ralph A. Saporito and for clarifications about poison frog alkaloid  
 272 profiles, Rebecca D. Tarvin for sharing unpublished results, and Álvaro Hernandez for assistance  
 273 with transcriptome sequencing. This work was supported by a Seed Grant from the Faculty of  
 274 Sciences at Universidad de los Andes to R.M., a Basic Sciences Grant from the Vicerectory of  
 275 Research of the same institution to A.A. and R.M., and NSF Doctoral Dissertation Improvement  
 276 Grant (DEB-1702014) to R.M. and Marcus R. Kronforst. R.M. was partially supported by a  
 277 Fellowship for Young Researchers and Innovators (Otto de Greiff) from COLCIENCIAS. Tissue  
 278 collections were authorized by permits No. 004, 36, 2194, and 1177 granted by the Colombian  
 279 Ministry of Environment and Authority for Environmental Licenses (ANLA), 078-2003 from the  
 280 Peruvian National Insititute of Natural Resources, 002-012012 from the Nicaraguan Environment  
 281 and Natural Resource Ministry (MARENA), and SC/A-37-11 from the Panamanian Genetic  
 282 Resource Access Unit (UNARGEN).

## 283 Tables

284 Table 1. Number of sequences analyzed per SCN4A segment and presence/amount of BTX in the  
285 species of poison frogs used in this study. Numbers in parentheses represent new sequences added  
286 for this study.

| Species                                   | Number of Sequences |     |      |       | BTX Presence    | Citation                                                       |
|-------------------------------------------|---------------------|-----|------|-------|-----------------|----------------------------------------------------------------|
|                                           | DI                  | DII | DIII | DIV   |                 |                                                                |
| <i>Allobates femoralis</i>                | 1                   | 0   | 0    | 1     | N               | (Daly et al. 1987; Darst et al. 2005; Saporito and Grant 2018) |
| <i>Allobates talamancae</i>               | 1                   | 0   | 0    | 1     | N               | (Daly et al. 1994)                                             |
| <i>Allobates zaparo</i>                   | 1                   | 0   | 0    | 1     | N               | (Darst et al. 2005)                                            |
| <i>Rheobates palmatus</i>                 | 2 (2)               | 0   | 0    | 2 (2) | NA              | -                                                              |
| <i>Ameerega bilinguis</i>                 | 1                   | 1   | 1    | 1     | N               | (Daly et al. 2009)                                             |
| <i>Ameerega hahneli</i>                   | 1                   | 0   | 0    | 1     | N               | (Daly et al. 2009)                                             |
| <i>Ameerega parvula</i>                   | 1                   | 1   | 0    | 1     | N               | (Daly et al. 2009)                                             |
| <i>Ameerega petersi</i>                   | 1 (1)               | 0   | 0    | 1 (1) | N               | (Daly et al. 1987)                                             |
| <i>Ameerega picta</i>                     | 1 (1)               | 0   | 0    | 1 (1) | N               | (Daly et al. 1987, 2009)                                       |
| <i>Ameerega trivittata</i>                | 1 (1)               | 0   | 0    | 1 (1) | N               | (Daly et al. 1987, 2009)                                       |
| <i>Colostethus panamansis</i>             | 1                   | 0   | 0    | 1     | N               | (Daly et al. 1994)                                             |
| <i>Epipedobates anthonyi</i> <sup>2</sup> | 1                   | 0   | 0    | 1     | N               | (Daly et al. 1987; Spande et al. 1992)                         |
| <i>Epipedobates boulengeri</i>            | 1                   | 1   | 1    | 1     | N               | (Darst et al. 2005)                                            |
| <i>Epipedobates boulengeri north</i>      | 3 (3)               | 0   | 0    | 3 (3) | NA              | -                                                              |
| <i>Epipedobates darwinwallacei</i>        | 1                   | 0   | 0    | 1     | N <sup>1</sup>  | (Santos and Cannatella 2011)                                   |
| <i>Epipedobates machalilla</i>            | 1                   | 0   | 0    | 1     | N               | (Santos and Cannatella 2011)                                   |
| <i>Epipedobates tricolor</i> <sup>2</sup> | 1                   | 1   | 1    | 1     | N               | R.D. Tarvin <i>pers com</i>                                    |
| <i>Silverstoneia nubicola</i>             | 1 (1)               | 0   | 0    | 1 (1) | NA <sup>3</sup> | -                                                              |
| <i>Silverstoneia cf erasmios</i>          | 2 (2)               | 0   | 0    | 2 (2) | NA <sup>3</sup> | -                                                              |
| <i>Andinobates bombetes</i>               | 2 (2)               | 0   | 0    | 2 (2) | N               | (Myers and Daly 1980)                                          |
| <i>Andinobates fulguritus</i>             | 2 (2)               | 0   | 0    | 2 (2) | N               | (Daly et al. 1987)                                             |
| <i>Dendrobates auratus</i>                | 17 (2)              | 0   | 0    | 2 (2) | N               | (Daly et al. 1987)                                             |
| <i>Dendrobates tinctorius</i>             | 1                   | 1   | 1    | 1     | N               | (Daly et al. 1987)                                             |
| <i>Dendrobates truncatus</i>              | 2 (2)               | 0   | 0    | 2 (2) | N               | (Daly et al. 1987)                                             |
| <i>Oophaga granulifera</i>                | 11                  | 0   | 0    | 0     | N               | (Daly et al. 1987)                                             |
| <i>Oophaga histrionica</i>                | 2 (2)               | 0   | 0    | 2 (2) | N               | (Myers and Daly 1976; Daly et al. 1987)                        |
| <i>Oophaga pumilio</i>                    | 35 (1)              | 0   | 0    | 1 (1) | N               | (Myers and Daly 1976; Daly et al. 1987)                        |
| <i>Phyllobates aurotaenia north</i>       | 6 (6)               | 0   | 0    | 6 (6) | Y               | (Märki and Witkop 1963; Daly et al. 1965)                      |

|                                               |         |       |         |         |    |                                          |
|-----------------------------------------------|---------|-------|---------|---------|----|------------------------------------------|
| <i>Phyllobates aurotaenia</i><br><i>south</i> | 3 (3)   | 0     | 0       | 3 (3)   | NA | -                                        |
| <i>Phyllobates bicolor</i>                    | 6 (6)   | 1 (1) | 1 (1)   | 6 (6)   | Y  | (Myers et al. 1978)                      |
| <i>Phyllobates lugubris</i>                   | 5 (5)   | 0     | 0       | 5 (5)   | Y  | (Myers et al. 1978; Daly et al. 1987)    |
| <i>Phyllobates terribilis</i>                 | 14 (13) | 1     | 13 (13) | 14 (14) | Y  | (Myers et al. 1978)                      |
| <i>Phyllobates vittatus</i>                   | 2 (2)   | 0     | 0       | 2 (2)   | Y  | (Myers et al. 1978; Daly et al. 1987)    |
| <i>Ranitomeya toraro</i>                      | 2 (2)   | 0     | 0       | 2 (2)   | NA | -                                        |
| <i>Ranitomeya</i><br><i>ventrimaculata</i>    | 1 (1)   | 0     | 0       | 1 (1)   | N  | (Daly et al. 1987)                       |
| <i>Hyloxalus italo</i>                        | 1       | 1     | 1       | 1       | NA | -                                        |
| <i>Hyloxalus nexipus</i>                      | 1       | 1     | 1       | 1       | N  | (Santos and Cannatella 2011)             |
| <i>Mantella aurantiaca</i>                    | 1       | 1     | 1       | 1       | N  | (Garraffo et al. 1993; Daly et al. 1996) |

<sup>1</sup>Referred to as *Epipedobates* sp. F by Santos and Cannatella (2011)

<sup>2</sup>Although Spande et al (1992) report an alkaloid profile for *E. tricolor*, based on the localities reported it is most likely that the actual species used was *E. anthonyi* (Graham et al. 2004).

<sup>3</sup>The only chemical analysis of skin extracts from *Silverstoneia* species available in the literature (to our knowledge) revealed a complete absence of alkaloids or Tetrodotoxin in *S. flotator* (Mebs et al. 2018).

## 292 Figures

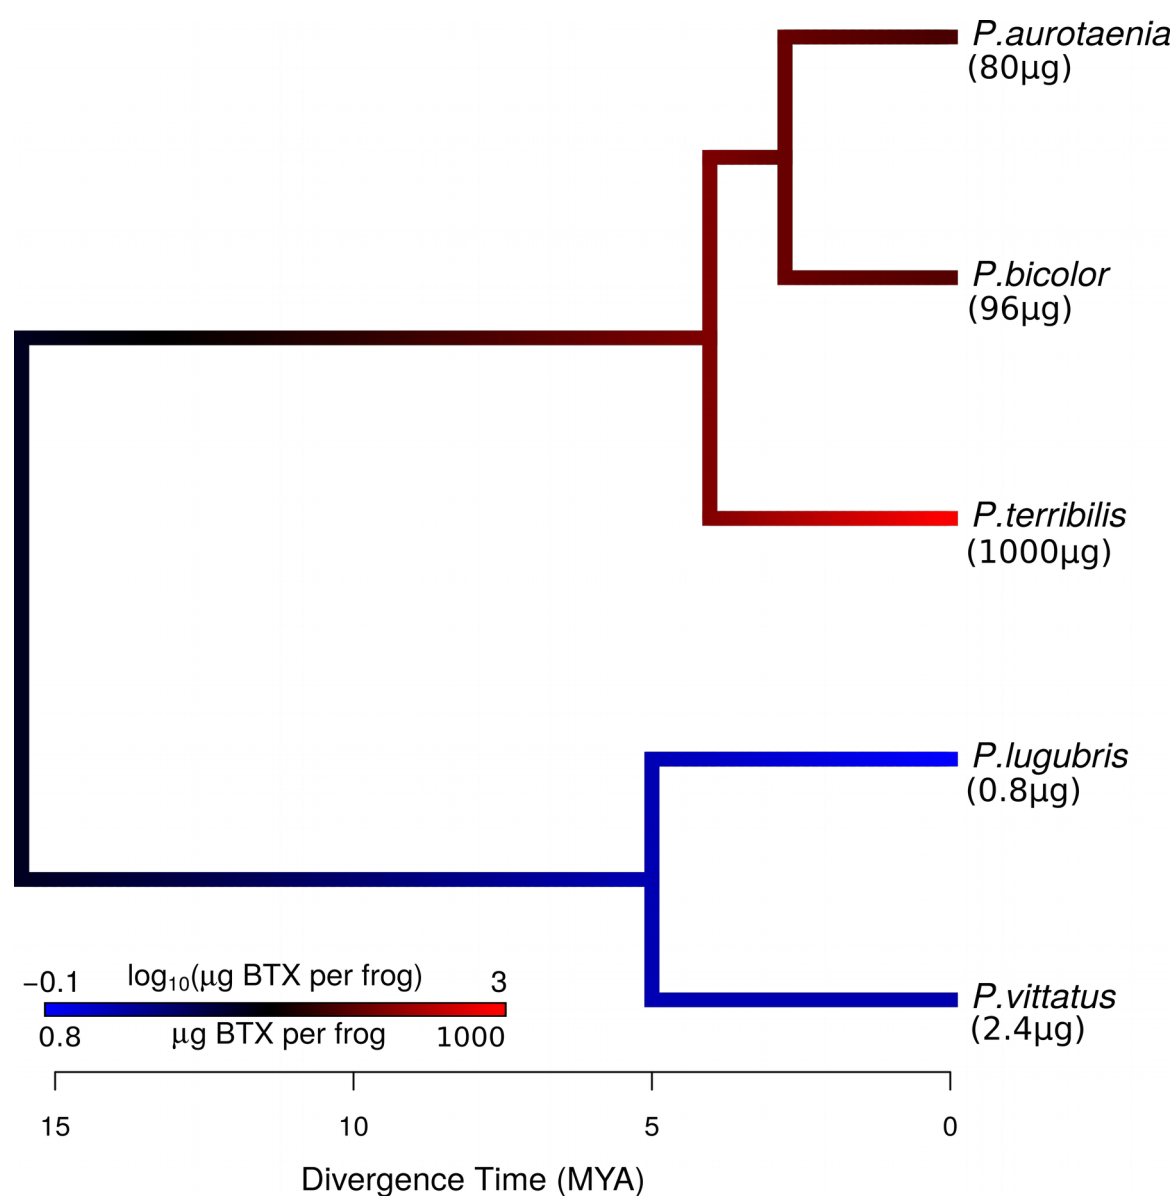

293 Figure 1. Phylogenetic relationships and average levels of cutaneous BTX per frog among  
 294 *Phyllobates* species, estimated from pooled batches of frog skins, as presented in Table 2 of Daly et  
 295 al. (1987). Branches were colored based on a maximum likelihood ancestral state reconstruction  
 296 under Brownian Motion using the approach of Revell (2013; Method 2). The topology follows  
 297 Grant et al. (2017), and divergence times were obtained from the TimeTree portal (Kumar et al.  
 298 2017). Numbers above the color bar are in  $\log_{10}$  units, whereas those below the bar are in standard  
 299 units.

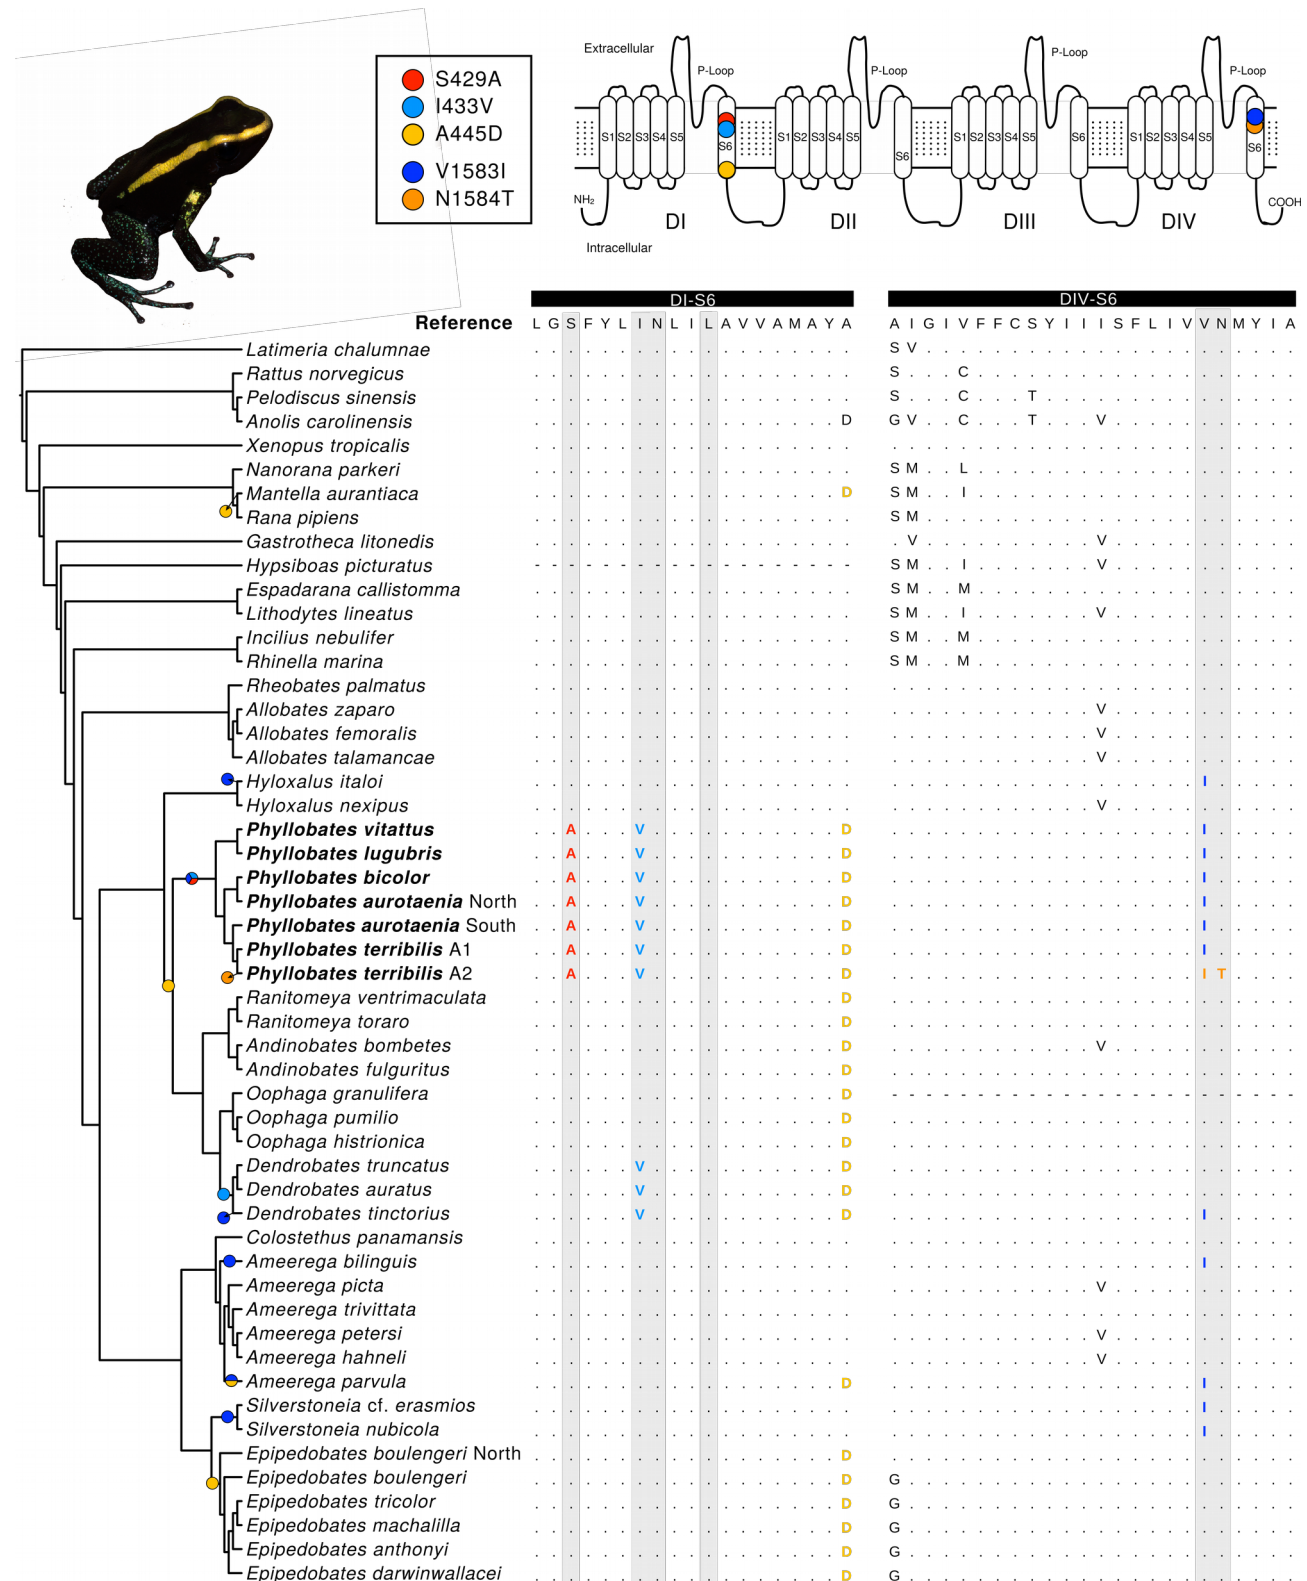

300 Figure 2. Amino acid sequences and ancestral reconstructions of the DI and DIV S6 segments of  
301 dendrobatids and other frogs. The reference sequence corresponds to the reconstructed ancestral  
302 frog sequence. The location of substitutions potentially important for autoresistance is indicated on  
303 the Na<sub>v</sub>1.4 schematic above the alignment, and the origin of each substitution is indicated on the  
304 corresponding branch. Sites known to be involved in BTX binding (Table S4) are shaded in grey.



305 The topology follows Grant et al. (2017) and Pyron and Wiens (2011), and branch lengths are not  
306 meaningful. Non-anuran sequences (i.e. coelacanth, rat, turtle, and anole) are only shown for  
307 comparison, and were not used in analyses.

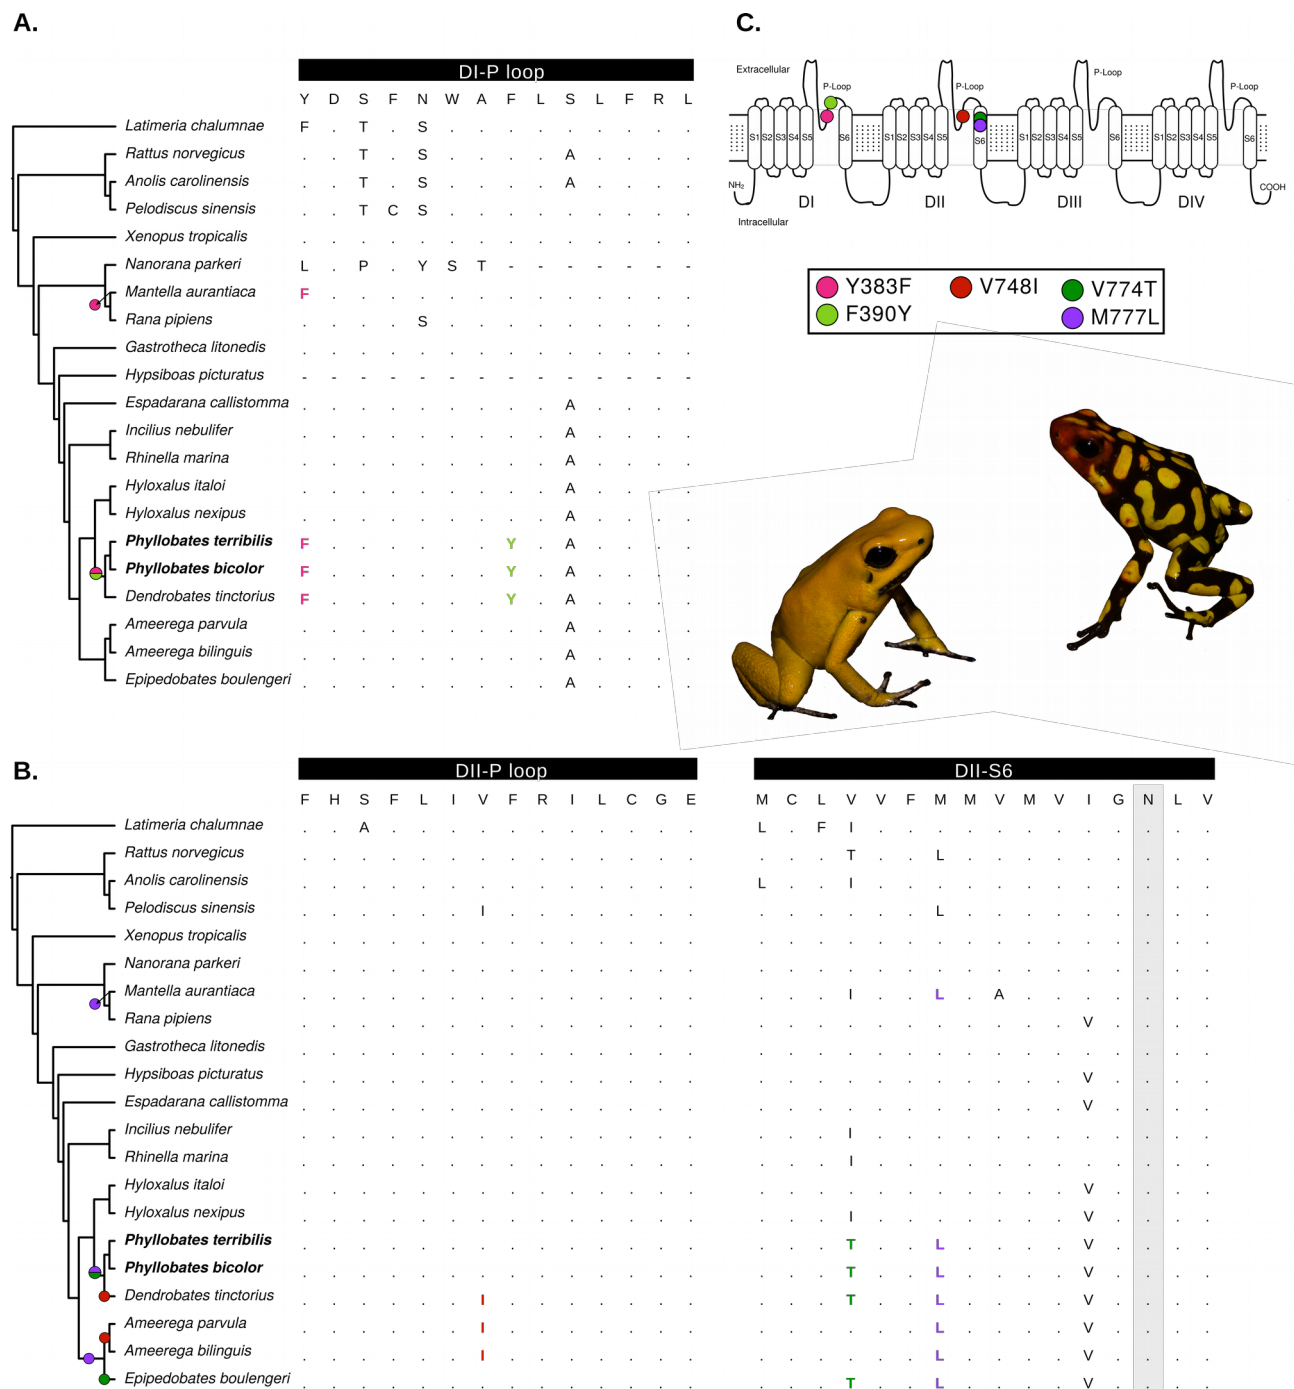

308 Figure 3. Amino acid sequences and ancestral reconstructions of the DI P-loop (A) and the DII P-  
309 loop and S6 segments (B). The locations and evolutionary origins of mutations are shown in panel  
310 C and on the phylogeny. The topology and shading are as in Figure 2.

# References

- Albuquerque, E. X., J. E. Warnick, F. M. Sansone, and J. W. Daly. 1973. The pharmacology of batrachotoxin. V. A comparative study of membrane properties and the effect of batrachotoxin on sartorius muscles of the frogs *Phyllobates aurotaenia* and *Rana pipiens*. J. Pharmacol. Exp. Ther. 184:129–315.
- Arce, F., and J. T. Rengifo. 2013. Dieta de *Phyllobates aurotaenia* y *Oophaga histrionica* (Anura: Dendrobatidae) en el municipio del Alto Baudó, Chocó, Colombia. Acta Zool. Mex. 29:255–268.
- Backx, P., D. Yue, J. Lawrence, E. Marban, and G. Tomaselli. 1992. Molecular localization of an ion-binding site within the pore of mammalian sodium channels. Science (80-. ). 257:248–251.
- Bolger, A. M., M. Lohse, and B. Usadel. 2014. Trimmomatic: A flexible trimmer for Illumina sequence data. Bioinformatics 30:2114–2120.
- Brodie III, E. D., and E. D. Brodie Jr. 1999. Costs of exploiting poisonous prey: evolutionary trade-offs in a predator-prey arms race. Evolution (N. Y). 53:626–631.
- Brodie Jr., E. D., B. J. Ridenhour, and E. D. Brodie III. 2002. The evolutionary response of predators to dangerous prey: Hotspots and coldspots in the geographic mosaic of coevolution between garter snakes and newts. Evolution (N. Y). 56:2067–2082.
- Caldwell, J. P. 1996. The evolution of myrmecophagy and its correlates in poison frogs (Family Dendrobatidae). J. Zool. 240:75–101. Blackwell Publishing Ltd.
- Chiamvimonvat, N., M. T. Pérez-García, G. F. Tomaselli, and E. Marban. 1996. Control of ion flux and selectivity by negatively charged residues in the outer mouth of rat sodium channels. J. Physiol. 491:51–59.
- Christenson, M. K., A. J. Trease, L.-P. Potluri, A. J. Jezewski, V. M. Davis, L. a. Knight, A. S. Kolok, and P. H. Davis. 2014. *De novo* Assembly and analysis of the Northern Leopard Frog *Rana pipiens* transcriptome. J. Genomics 2:141–149.
- Daly, J. W. 1998. Thirty years of discovering arthropod alkaloids in amphibian skin. J. Nat. Prod. 61:162–172. Laboratory of Bioorganic Chemistry, National Institute of Diabetes and Digestive and Kidney Diseases, National Institutes of Health, Bethesda, Maryland 20892, USA.
- Daly, J. W., N. R. Andriamaharavo, M. Andriantsiferana, and C. W. Myers. 1996. Madagascan Poison Frogs (*Mantella*) and Their Skin Alkaloids. Am. Museum Novit. 3177:34.
- Daly, J. W., F. Gusovsky, C. W. Myers, M. Yotsu-Yamashita, and T. Yasumoto. 1994. First occurrence of tetrodotoxin in a dendrobatid frog (*Colostethus inguinalis*), with further reports for the bufonid genus *Atelopus*. Toxicon 32:279–285.
- Daly, J. W., C. W. Myers, J. E. Warnick, and E. X. Albuquerque. 1980. Levels of batrachotoxin and lack of sensitivity to its action in poison-dart frogs (*Phyllobates*). Science (80-. ). 208:1383–1385.

- 347 Daly, J. W., C. W. Myers, and N. Whittaker. 1987. Further classification of skin alkaloids from  
348 neotropical poison frogs (dendrobatidae), with a general survey of toxic/noxious substances in  
349 the amphibia. *Toxicon* 25:1023–1095. Elsevier Ltd.
- 350 Daly, J. W., T. F. Spande, and H. M. Garraffo. 2005. Alkaloids from amphibian skin: A tabulation of  
351 over eight-hundred compounds. *J. Nat. Prod.* 68:1556–1575.
- 352 Daly, J. W., N. Ware, R. A. Saporito, T. F. Spande, and H. M. Garraffo. 2009. N-  
353 methyldecahydroquinolines: An unexpected class of alkaloids from Amazonian poison frogs  
354 (Dendrobatidae). *J. Nat. Prod.* 72:1110–1114.
- 355 Daly, J. W., B. Witkop, P. Bommer, and K. Biemann. 1965. Batrachotoxin. The active principle of  
356 the Colombian arrow poison frog, *Phylllobates bicolor*. *J. Am. Chem. Soc.* 87:124–126.  
357 American Chemical Society.
- 358 Darriba, D., G. L. Taboada, R. Doallo, and D. Posada. 2012. jModelTest 2: More models, new  
359 heuristics and parallel computing. *Nat Meth* 9:772. Nature Publishing Group.
- 360 Darriba, D., G. L. Taboada, R. Doallo, and D. Posada. 2011. ProtTest 3: Fast selection of best-fit  
361 models of protein evolution. *Bioinformatics* 27:1164–1165.
- 362 Darst, C. R., P. A. Menéndez-Guerrero, L. A. Coloma, and D. C. Cannatella. 2005. Evolution of  
363 dietary specialization and chemical defense in poison frogs (Dendrobatidae): a comparative  
364 analysis. *Am. Nat.* 165:56–69. Section of Integrative Biology, Texas Memorial Museum,  
365 University of Texas, Austin, Texas 78712, USA. catdarst@utexas.edu.
- 366 Dean, A. M., and J. W. Thornton. 2007. Mechanistic approaches to the study of evolution: the  
367 functional synthesis. *Nat. Rev. Genet.* 8:675–688. Nature Publishing Group.
- 368 Dobler, S., G. Petschenka, and H. Pankoke. 2011. Coping with toxic plant compounds - The insect's  
369 perspective on iridoid glycosides and cardenolides. *Phytochemistry* 72:1593–1604. Elsevier  
370 Ltd.
- 371 Edgar, R. C. 2004. MUSCLE: multiple sequence alignment with high accuracy and high  
372 throughput. *Nucleic Acids Res.* 32:1792–1797.
- 373 Edmunds, M. 1974. Defence in animals : a survey of anti-predator defences. Longman, Burnt Mill.
- 374 Favre, I., E. Moczydlowski, and L. Schild. 1996. On the structural basis for ionic selectivity among  
375 Na<sup>+</sup>, K<sup>+</sup>, and Ca<sup>2+</sup> in the voltage-gated sodium channel. *Biophys. J.* 71:3110–3125.
- 376 Feldman, C. R., E. D. Brodie Jr., E. D. Brodie III, and M. E. Pfrender. 2012. Constraint shapes  
377 convergence in tetrodotoxin-resistant sodium channels of snakes. *Proc. Natl. Acad. Sci.*  
378 109:4556–4561.
- 379 Garraffo, H. M., J. Caceres, J. W. Daly, T. F. Spande, N. R. Andriamaharavo, and M.  
380 Andriantsiferana. 1993. Alkaloids in madagascan frogs (Mantella): Pumiliotoxins,  
381 indolizidines, quinolizidines, and pyrrolizidines. *J. Nat. Prod.* 56:1016–1038.
- 382 Gassmann, A. J., Y. Carrière, and B. E. Tabashnik. 2009. Fitness costs of insect resistance to  
383 *Bacillus thuringiensis*. *Annu. Rev. Entomol.* 54:147–163.

- 384 Geffeney, S. L., E. Fujimoto, E. D. Brodie III, E. D. Brodie Jr., and P. C. Ruben. 2005. Evolutionary  
385 diversification of TTX-resistant sodium channels in a predator-prey interaction. *Nature*  
386 434:759–63. Nature Publishing Group.
- 387 Grabherr, M. G., B. J. Haas, M. Yassour, J. Z. Levin, D. a Thompson, I. Amit, X. Adiconis, L. Fan,  
388 R. Raychowdhury, Q. Zeng, Z. Chen, E. Mauceli, N. Hacohen, A. Gnirke, N. Rhind, F. di  
389 Palma, B. W. Birren, C. Nusbaum, K. Lindblad-Toh, N. Friedman, and A. Regev. 2011. Full-  
390 length transcriptome assembly from RNA-Seq data without a reference genome. *Nat.*  
391 *Biotechnol.* 29:644–652.
- 392 Graham, C. H., S. R. Ron, J. C. Santos, C. J. Schneider, and C. Moritz. 2004. Integrating  
393 phylogenetics and environmental niche models to explore speciation mechanisms in  
394 dendrobatid frogs. *Evolution* (N. Y). 58:1781–1793. Society for the Study of Evolution,  
395 Museum of Vertebrate Zoology, University of California, Berkeley, California 94720, USA.  
396 [cgraham@life.bio.sunysb.edu](mailto:cgraham@life.bio.sunysb.edu).
- 397 Grant, T., M. Rada, M. Anganoy-Criollo, A. Batista, P. H. Dias, A. M. Jeckel, D. J. Machado, and J.  
398 V. Rueda-Almonacid. 2017. Phylogenetic systematics of Dart-Poison frogs and their relatives  
399 revisited (Anura: Dendrobatoidea). *South Am. J. Herpetol.* 12:S1–S90.
- 400 Groeters, F. R., B. E. Tabashnik, N. Finson, and M. W. Johnson. 1994. Fitness Costs of Resistance  
401 to *Bacillus thuringiensis* in the Diamondback Moth (*Plutella xylostella*). *Evolution* (N. Y).  
402 48:197.
- 403 Guindon, S., J. F. Dufayard, V. Lefort, M. Anisimova, W. Hordijk, and O. Gascuel. 2010. New  
404 algorithms and methods to estimate maximum-likelihood phylogenies: Assessing the  
405 performance of PhyML 3.0. *Syst. Biol.* 59:307–321.
- 406 Guindon, S., and O. Gascuel. 2003. A simple, fast, and accurate algorithm to estimate large  
407 phylogenies by maximum likelihood. *Syst Biol* 52:696–704. LIRMM, CNRS, 161 Rue Ada,  
408 34392, Montpellier Cedex 5, France.
- 409 Hanifin, C. T., and W. F. Gilly. 2015. Evolutionary history of a complex adaptation: Tetrodotoxin  
410 resistance in salamanders. *Evolution* (N. Y). 69:232–244. Society for the Study of Evolution.
- 411 Kumar, S., G. Stecher, M. Suleski, and S. B. Hedges. 2017. TimeTree: A Resource for Timelines,  
412 Timetrees, and Divergence Times. *Mol. Biol. Evol.* 34:1812–1819.
- 413 Lee, C. H., D. K. Jones, C. Ahern, M. F. Sarhan, and P. C. Ruben. 2011. Biophysical costs  
414 associated with tetrodotoxin resistance in the sodium channel pore of the garter snake,  
415 *Thamnophis sirtalis*. *J. Comp. Physiol. A Neuroethol. Sensory, Neural, Behav. Physiol.*  
416 197:33–43.
- 417 Märki, F., and B. Witkop. 1963. The venom of the Colombian arrow poison frog *Phyllobates*  
418 *bicolor*. *Experientia* 19:329–338.
- 419 Mebs, D. 2001. Toxicity in animals. *Trends in evolution?* *Toxicon* 39:87–96.
- 420 Mebs, D., M. Yotsu-Yamashita, W. Pogoda, J. Vargas Alvarez, R. Ernst, G. Köhler, and S. W.  
421 Toennes. 2018. Lack of alkaloids and tetrodotoxin in the neotropical frogs *Allobates* spp.  
422 (*Aromobatidae*) and *Silverstoneia flotator* (*Dendrobatidae*). *Toxicon* 152:103–105.

- 423 Myers, C. W., and J. W. Daly. 1976. Preliminary evaluation of skin toxins and vocalizations in  
424 taxonomic and evolutionary studies of poison-dart frogs (Dendrobatidae). *Bull. Am. Museum*  
425 *Nat. Hist.* 157:173–262.
- 426 Myers, C. W., and J. W. Daly. 1980. Taxonomy and ecology of *Dendrobates bombetes*, a new  
427 Andean poison frog with new skin toxins. *Am. Museum Novit.* 2692:1–23.
- 428 Myers, C. W., J. W. Daly, and B. Malkin. 1978. A dangerously toxic new frog (*Phyllobates*) used by  
429 Emberá Indians of western Colombia, with discussion of blowgun fabrication and dart  
430 poisoning. *Bull. Am. Museum Nat. Hist.* 161:307–366.
- 431 Osorio, D., L. Valenzuel, C. Bermudez-Rivas, and S. Castaño. 2015. Descripción de la dieta de una  
432 población de *Oophaga histrionica* (Athesphatanura: Dendrobatidae) en un enclave seco del  
433 Valle del Cauca, Colombia. *Rev. Biodivers. Neotrop.* 5:29.
- 434 Pérez-García, M. T., N. Chiamvimonvat, E. Marban, and G. F. Tomaselli. 1996. Structure of the  
435 sodium channel pore revealed by serial cysteine mutagenesis. *Proc. Natl. Acad. Sci. U. S. A.*  
436 93:300–4.
- 437 Revell, L. J. 2013. Two new graphical methods for mapping trait evolution on phylogenies.  
438 *Methods Ecol. Evol.* 4:754–759.
- 439 Richardson, M. F., F. Sequeira, D. Selechnik, M. Carneiro, M. Vallinoto, J. G. Reid, A. J. West, M.  
440 R. Crossland, R. Shine, and L. A. Rollins. 2017. Improving amphibian genomic resources: a  
441 multi-tissue reference transcriptome of an iconic invader. *Gigascience*, doi:  
442 10.1093/gigascience/gix114.
- 443 Rogers, R. L., L. Zhou, C. Chu, R. Márquez, A. Corl, T. Linderoth, L. Freeborn, M. D. MacManes,  
444 Z. Xiong, J. Zheng, C. Guo, X. Xun, M. R. Kronforst, K. Summers, Y. Wu, H. Yang, C. L.  
445 Richards-Zawacki, G. Zhang, and R. Nielsen. 2018. Genomic takeover by transposable  
446 elements in the Strawberry poison frog. *Mol. Biol. Evol.*, doi: 10.1093/molbev/msy185.
- 447 Santos, J. C., and D. C. Cannatella. 2011. Phenotypic integration emerges from aposematism and  
448 scale in poison frogs. *Proc. Natl. Acad. Sci.* 108:6175–6180.
- 449 Santos, J. C., L. A. Coloma, and D. C. Cannatella. 2003. Multiple, recurring origins of aposematism  
450 and diet specialization in poison frogs. *Proc. Natl. Acad. Sci. U. S. A.* 100:12792–12797. Univ  
451 Texas, Sect Integrat Biol C0930, Austin, TX 78712 USA.
- 452 Santos, J. C., R. D. Tarvin, and L. A. O’Connell. 2016. A Review of chemical defense in poison  
453 frogs (Dendrobatidae): Ecology, pharmacokinetics, and autoresistance. Pp. 305–337 *in*  
454 *Chemical Signals in Vertebrates 13*. Springer International Publishing, Cham.
- 455 Saporito, R. A., and T. Grant. 2018. Comment on Amézquita et al. (2017) “Conspicuousness, color  
456 resemblance, and toxicity in geographically diverging mimicry: The pan-Amazonian frog  
457 *Allobates femoralis*.” *Evolution* (N. Y). 72:1009–1014.
- 458 Silverstone, P. A. 1976. A revision of the poison-arrow frogs of the genus *Phyllobates* Bibron in  
459 Sagra (Family Dendrobatidae). *Nat. Hist. Museum Los Angeles County, Sci. Bull.* 27:1–53.  
460 Natural History Museum of Los Angeles County, Natural History Museum of Los Angeles  
461 County.



- 462 Spande, T. F., H. M. Garraffo, M. W. Edwards, H. J. C. Yeh, L. Pannell, and J. W. Daly. 1992.  
463 Epibatidine: a novel (chloropyridyl)azabicycloheptane with potent analgesic activity from an  
464 Ecuadoran poison frog. *J. Am. Chem. Soc.* 114:3475–3478. American Chemical Society.
- 465 Stern, D. L., and V. Orgogozo. 2009. Is genetic evolution predictable? *Science* (80-. ). 323:746–751.  
466 Department of Ecology and Evolutionary Biology, Howard Hughes Medical Institute,  
467 Princeton University, Princeton, NJ 08544, USA. [dstern@princeton.edu](mailto:dstern@princeton.edu).
- 468 Strichartz, G., T. Rando, and G. K. Wang. 1987. An integrated view of the molecular toxinology of  
469 sodium channel gating in excitable cells. *Annu. Rev. Neurosci.* 10:237–267.
- 470 Sun, Y.-B., Z.-J. Xiong, X.-Y. Xiang, S.-P. Liu, W.-W. Zhou, X.-L. Tu, L. Zhong, L. Wang, D.-D.  
471 Wu, B.-L. Zhang, C.-L. Zhu, M.-M. Yang, H.-M. Chen, F. Li, L. Zhou, S.-H. Feng, C. Huang,  
472 G.-J. Zhang, D. Irwin, D. M. Hillis, R. W. Murphy, H.-M. Yang, J. Che, J. Wang, and Y.-P.  
473 Zhang. 2015. Whole-genome sequence of the Tibetan frog *Nanorana parkeri* and the  
474 comparative evolution of tetrapod genomes. *Proc. Natl. Acad. Sci.* 112:E1257–E1262.
- 475 Tarvin, R. D., C. M. Borghese, W. Sachs, J. C. Santos, Y. Lu, L. A. O’Connell, D. C. Cannatella, R.  
476 A. Harris, and H. H. Zakon. 2017a. Interacting amino acid replacements allow poison frogs to  
477 evolve epibatidine resistance. *Science* (80-. ). 357:1261–1266.
- 478 Tarvin, R. D., E. A. Powell, J. C. Santos, S. R. Ron, and D. C. Cannatella. 2017b. The birth of  
479 aposematism: High phenotypic divergence and low genetic diversity in a young clade of  
480 poison frogs. *Mol. Phylogenet. Evol.* 109:283–295. Elsevier Inc.
- 481 Tarvin, R. D., J. C. Santos, L. A. O’Connell, H. H. Zakon, and D. C. Cannatella. 2016. Convergent  
482 substitutions in a sodium channel suggest multiple origins of toxin resistance in poison frogs.  
483 *Mol. Biol. Evol.* 33:1068–1081.
- 484 Toft, C. A. 1981. Feeding Ecology of Panamanian Litter Anurans: Patterns in Diet and Foraging  
485 Mode. *J. Herpetol.* 15:139.
- 486 Tokuyama, T., J. Daly, B. Witkop, I. L. Karle, and J. Karle. 1968. The structure of batrachotoxinin  
487 A, a novel steroidal alkaloid from the Colombian arrow poison frog, *Phyllobates aurotaenia*. *J.*  
488 *Am. Chem. Soc.* 90:1917–1918. American Chemical Society.
- 489 Vences, M., J. Kosuch, R. Boistel, C. F. B. Haddad, E. La Marca, S. Lötters, and M. Veith. 2003.  
490 Convergent evolution of aposematic coloration in Neotropical poison frogs: a molecular  
491 phylogenetic perspective. *Org. Divers. Evol.* 3:215–226. Univ Amsterdam, Museum Zool, Inst  
492 Biodivers & Ecosyst Dynam, NL-1090 GT Amsterdam, Netherlands.
- 493 Vendantham, V., and S. C. Cannon. 2000. Rapid and Slow Voltage-Dependent Conformational  
494 Changes in Segment IVS6 of Voltage-Gated Na<sup>+</sup> Channels. *Biophys. J.* 78:2943–2958.  
495 Elsevier.
- 496 Wang, S.-Y., J. Mitchell, D. B. Tikhonov, B. S. Zhorov, and G. K. Wang. 2006. How batrachotoxin  
497 modifies the sodium channel permeation pathway: computer modeling and site-directed  
498 mutagenesis. *Mol. Pharmacol.* 69:788–795.
- 499 Wang, S.-Y., C. Nau, and G. K. Wang. 2000. Residues in Na<sup>+</sup> channel D3-S6 segment modulate  
500 both batrachotoxin and local anesthetic affinities. *Biophys. J.* 79:1379–1387. Elsevier.



501 Wang, S.-Y., D. B. Tikhonov, B. S. Zhorov, J. Mitchell, and G. K. Wang. 2007. Serine-401 as a  
502 batrachotoxin- and local anesthetic-sensing residue in the human cardiac Na<sup>+</sup> channel.  
503 Pflügers Arch. - Eur. J. Physiol. 454:277–287.

504 Wang, S.-Y., and G. K. Wang. 1999. Batrachotoxin-Resistant Na<sup>+</sup> Channels Derived from Point  
505 Mutations in Transmembrane Segment D4-S6. Biophys. J. 76:3141–3149. Elsevier.

506 Wang, S.-Y., and G. K. Wang. 2017. Single rat muscle Na<sup>+</sup> channel mutation confers batrachotoxin  
507 autoresistance found in poison-dart frog *Phylllobates terribilis*. Proc. Natl. Acad. Sci.  
508 201707873.

509 Wang, S. Y., M. Barile, and G. K. Wang. 2001. Disparate role of Na(+) channel D2-S6 residues in  
510 batrachotoxin and local anesthetic action. Mol. Pharmacol. 59:1100–1107.

511 Wang, S. Y., and G. K. Wang. 1998. Point mutations in segment I-S6 render voltage-gated Na<sup>+</sup>  
512 channels resistant to batrachotoxin. Proc. Natl. Acad. Sci. U. S. A. 95:2653–2658.

513 Warnick, J. E., E. X. Albuquerque, R. Onur, S. E. Jansson, J. Daly, T. Tokuyama, and B. Wiktop.  
514 1976. The pharmacology of batrachotoxin. VII. Structure-activity relationships and the effects  
515 of pH. J. Pharmacol. Exp. Ther. 193:232–245.

516 Wright, S. 1932. The roles of mutation, inbreeding, crossbreeding, and selection in evolution. Proc.  
517 Sixth Int. Congr. Genet. 1:356–366.

518 Yang, Z. 2007. PAML 4: Phylogenetic analysis by maximum likelihood. Mol. Biol. Evol. 24:1586–  
519 1591.

520 Yuan, M. L., and I. J. Wang. 2018. Sodium ion channel alkaloid resistance does not vary with  
521 toxicity in aposematic *Dendrobates* poison frogs: An examination of correlated trait evolution.  
522 PLoS One 13:e0194265.

523 Zhao, Y., V. Yarov-Yarovoy, T. Scheuer, and W. A. Catterall. 2004. A gating hinge in Na<sup>+</sup> channels:  
524 A molecular switch for electrical signaling. Neuron 41:859–865.

525 Zhen, Y., M. L. Aardema, E. M. Medina, M. Schumer, and P. Andolfatto. 2012. Parallel molecular  
526 evolution in an herbivore community. Science (80-. ). 337:1634–1637.

527 Zhou, J., and L. Fritz. 1994. Okadaic acid antibody localizes to chloroplasts in the DSP-toxin-  
528 producing dinoflagellates *Prorocentrum lima* and *Prorocentrum maculosum*. Phycologia 33:455–  
529 461. The International Phycological Society.
